# Supplementary material for: Polycondensation in confined nanopores toward the selective formation of narrowly dispersed linear polyesters
Source: Royal Society of Chemistry journal article supplement (doi:10.1039/d2py00526c), 2022-01-01
Supplement: d2py00526c1.pdf [file d2py00526c1.pdf]

## Supporting Information

### Polycondensation in Confined Nanopores toward Selective Formation of Narrowly Dispersed Linear Polyesters

Xiaowang Yu, Baojun Li, Jie Wang, Zhikun Shang, Donglai Tian, Guiyou Wang\* and Aiguo Hu\*

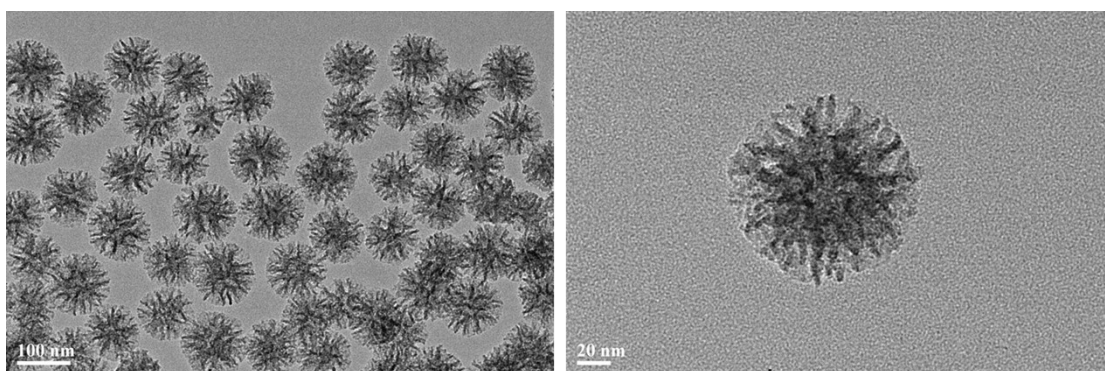

Figure S1. TEM images of DMSNs-Oct-SO<sub>3</sub>H

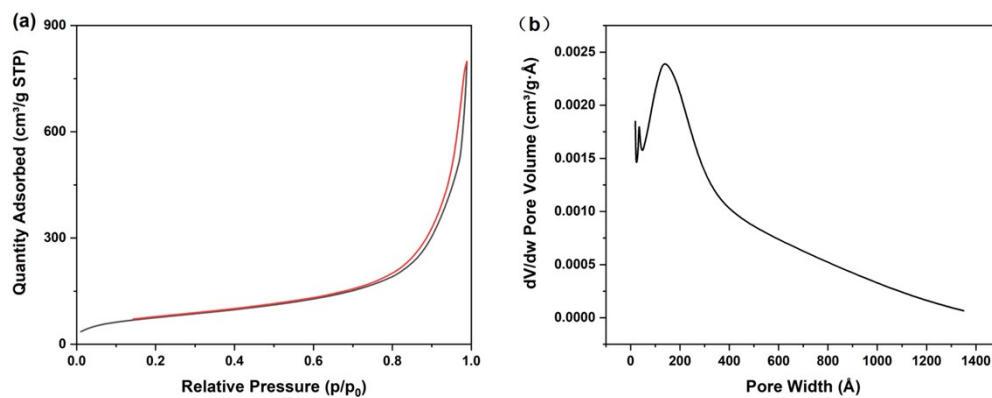

Figure S2. N<sub>2</sub> physisorption isotherms of the DMSNs-Oct-SO<sub>3</sub>H (a) and their corresponding pore size distribution curve calculated by the BJH method (b).

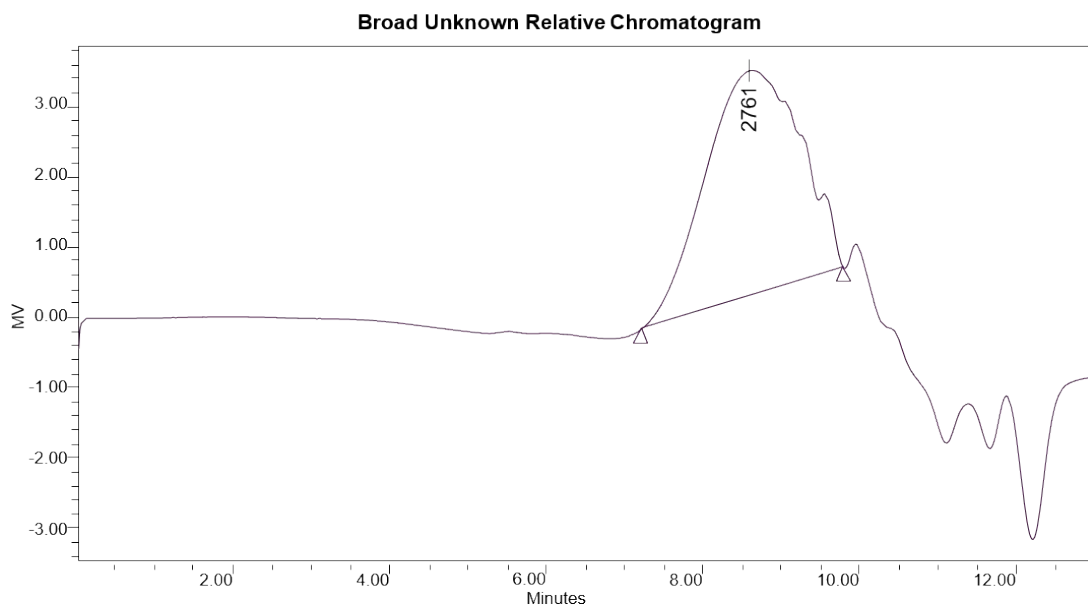

**Broad Unknown Relative Peak Table**

| Distribution Name | Mn (Dalton\$) | Mw (Dalton\$) | MP (Dalton\$) | Mz (Dalton\$) | Mz+1 (Dalton\$) | Polydispersity | Mz/Mw    | Mz+1/Mw  |
|-------------------|---------------|---------------|---------------|---------------|-----------------|----------------|----------|----------|
| 1                 | 2310          | 3109          | 2761          | 4095          | 5123            | 1.345586       | 1.317256 | 1.647726 |

**Figure S3.** GPC curve of PHDA from DMSNs-Oct-SO<sub>3</sub>H-catalyzed polycondensation

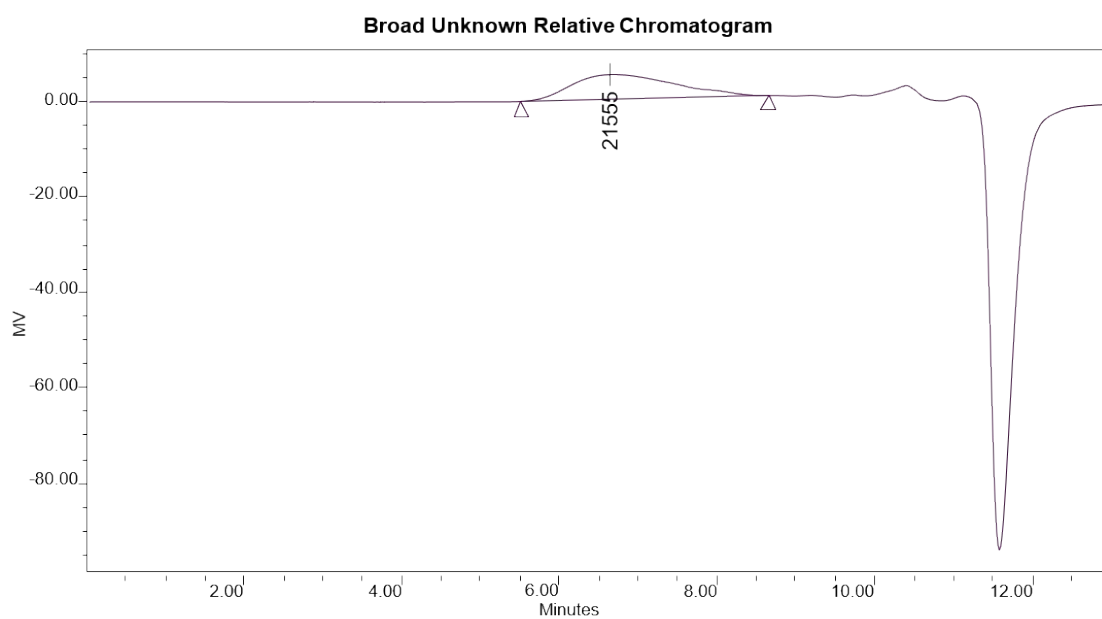

**Broad Unknown Relative Peak Table**

| Distribution Name | Mn (Dalton\$) | Mw (Dalton\$) | MP (Dalton\$) | Mz (Dalton\$) | Mz+1 (Dalton\$) | Polydispersity | Mz/Mw    | Mz+1/Mw  |
|-------------------|---------------|---------------|---------------|---------------|-----------------|----------------|----------|----------|
| 1                 | 13538         | 18831         | 21555         | 23846         | 27817           | 1.390947       | 1.266320 | 1.477176 |

**Figure S4.** GPC curve of PHDA from TsOH·H<sub>2</sub>O-catalyzed polycondensation

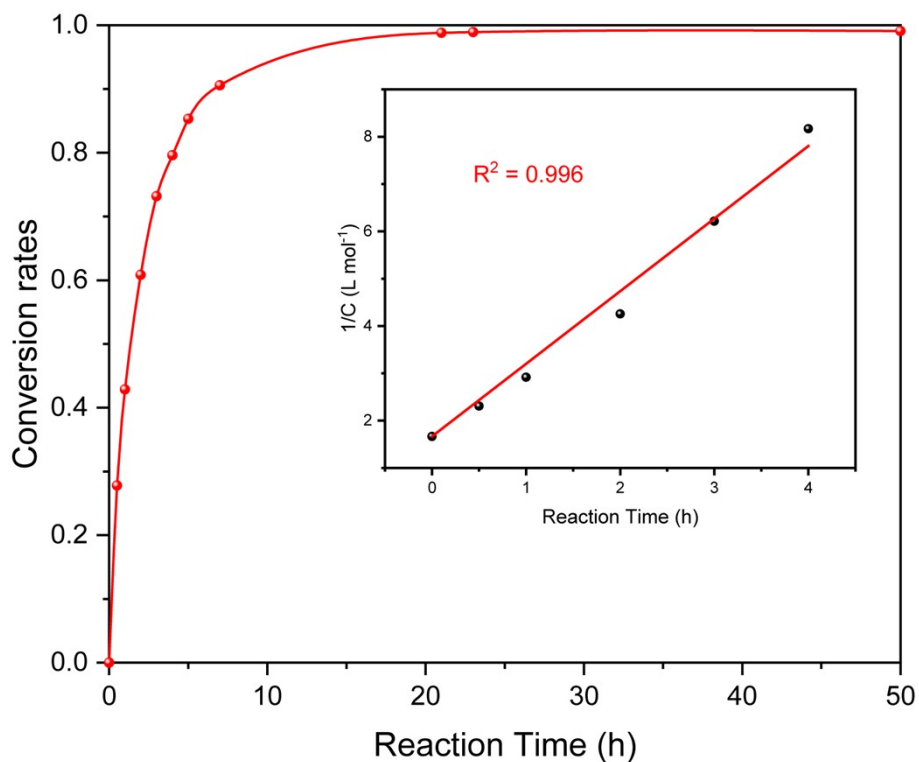

**Figure S5.** The conversion rates of 1,6-hexanediol was determined by GC at different time. The samples were dissolved in THF and Tetradecane as standard. Inset: the fitting plot of second-order reaction kinetics.

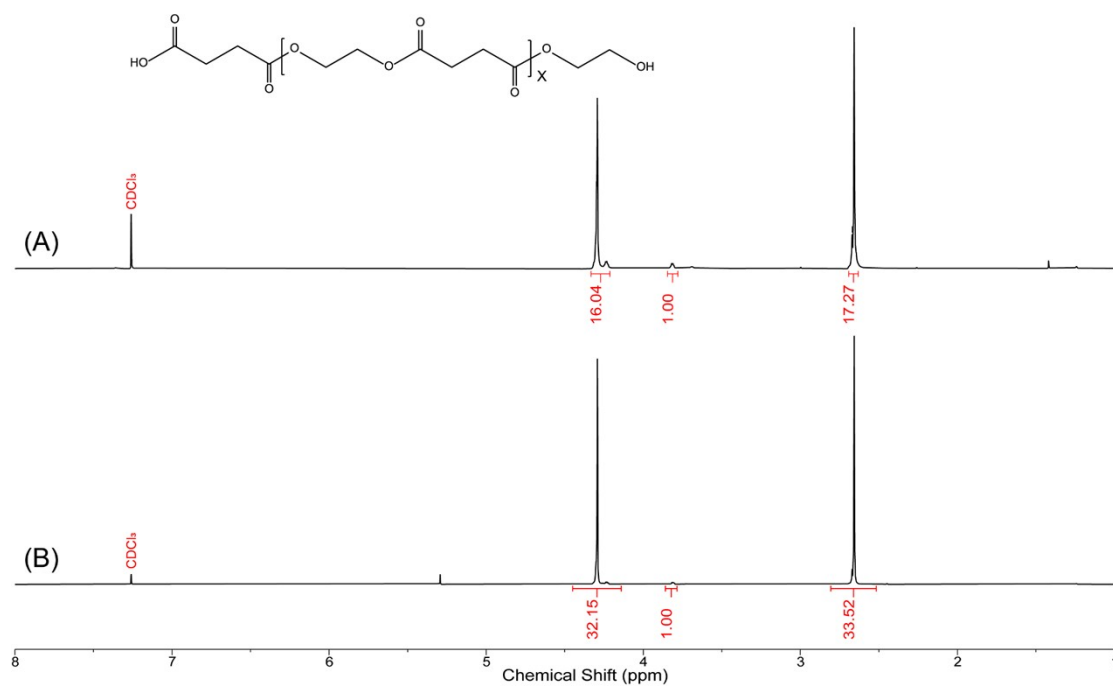

**Figure S6.** Comparison of <sup>1</sup>H NMR spectra of PE22 obtained from DMSNs-Oct-SO<sub>3</sub>H (A) and TsOH·H<sub>2</sub>O (B)-catalyzed polycondensation.

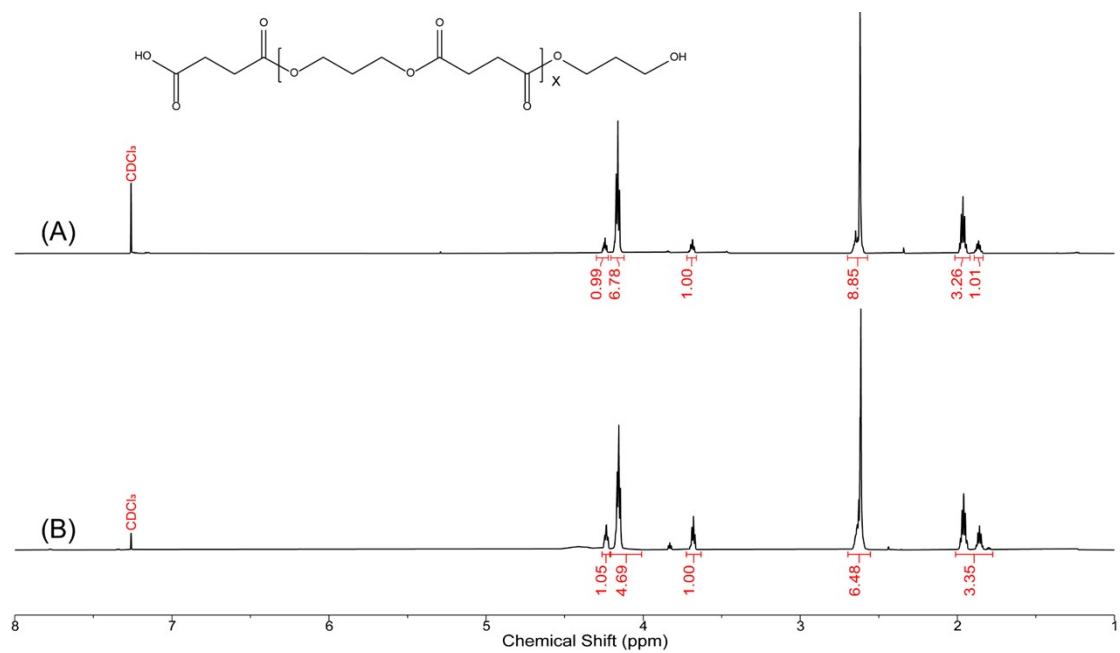

**Figure S7.** Comparison of  $^1\text{H}$  NMR spectra of PE23 obtained from DMSNs-Oct-SO<sub>3</sub>H (A) and TsOH·H<sub>2</sub>O (B)-catalyzed polycondensation.

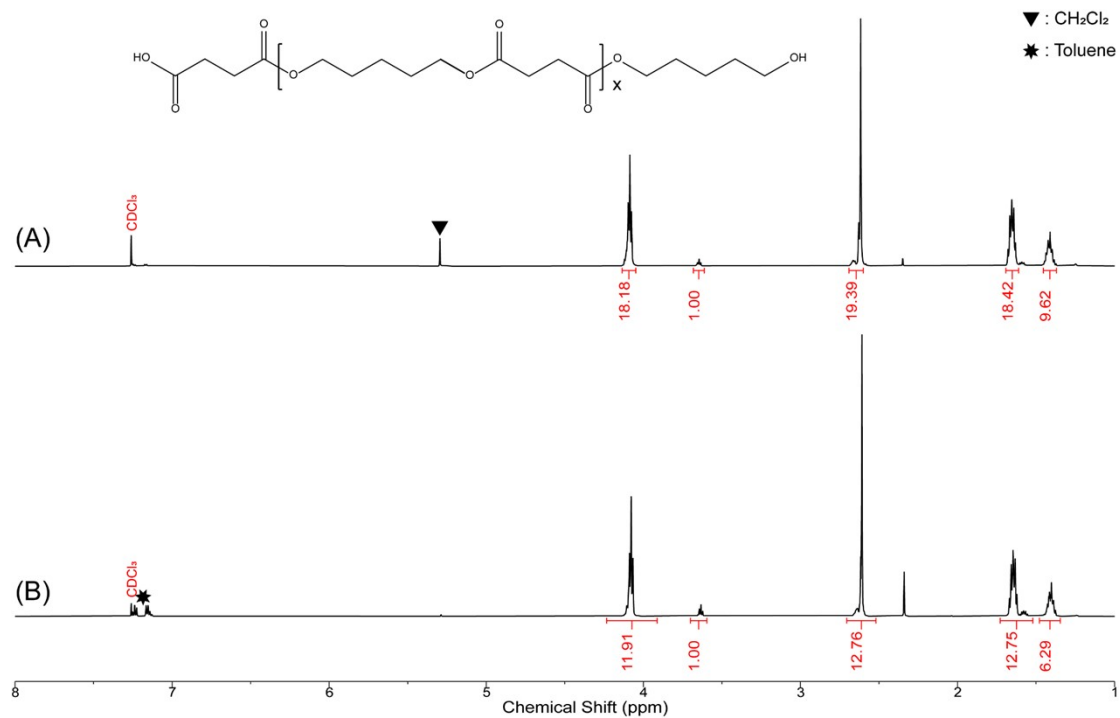

**Figure S8.** Comparison of  $^1\text{H}$  NMR spectra of PE25 obtained from DMSNs-Oct-SO<sub>3</sub>H (A) and TsOH·H<sub>2</sub>O (B)-catalyzed polycondensation.

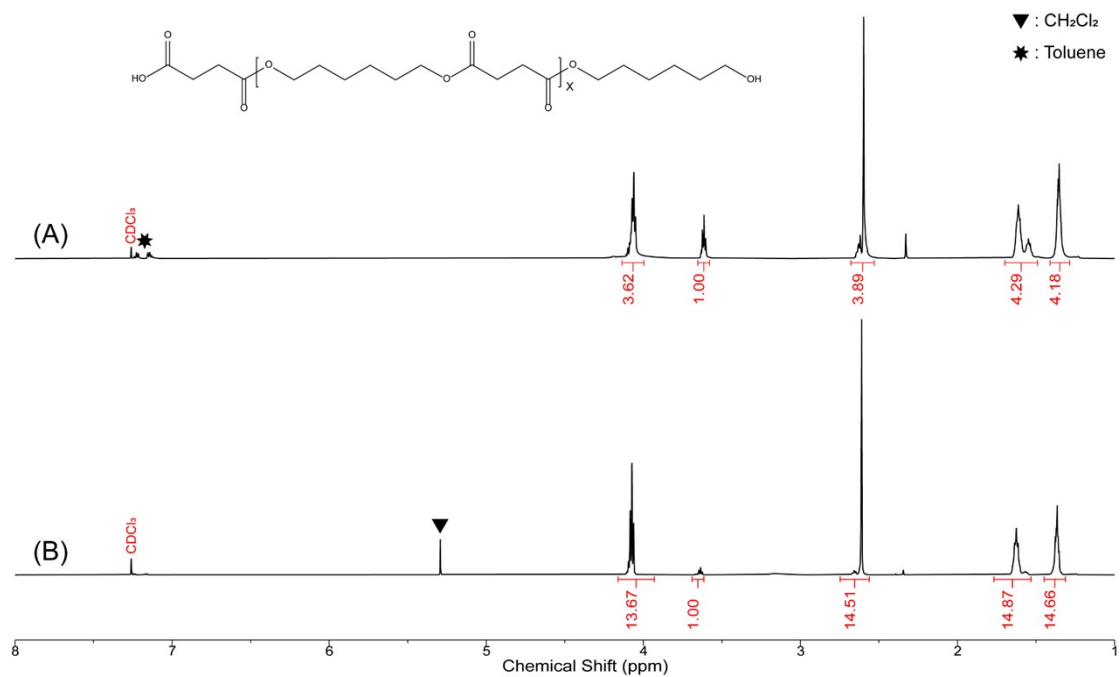

**Figure S9.** Comparison of  $^1\text{H}$  NMR spectra of PE26 obtained from DMSNs-Oct-SO<sub>3</sub>H (A) and TsOH·H<sub>2</sub>O (B)-catalyzed polycondensation.

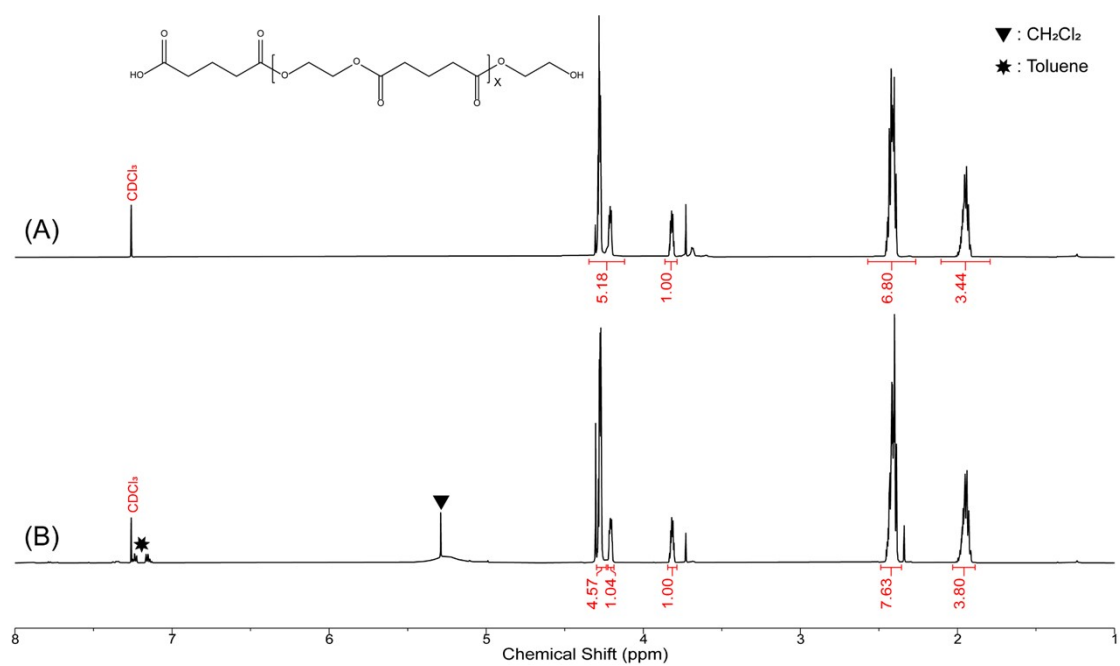

**Figure S10.** Comparison of  $^1\text{H}$  NMR spectra of PE32 obtained from DMSNs-Oct-SO<sub>3</sub>H (A) and TsOH·H<sub>2</sub>O (B)-catalyzed polycondensation.

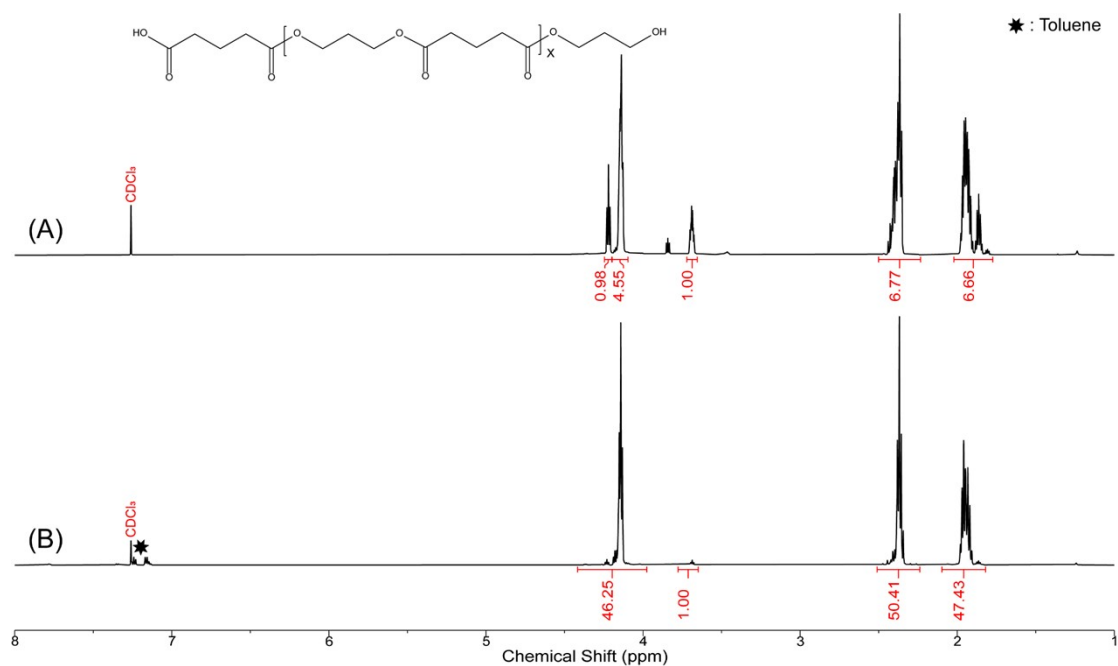

**Figure S11.** Comparison of  $^1\text{H}$  NMR spectra of PE33 obtained from DMSNs-Oct-SO<sub>3</sub>H (A) and TsOH·H<sub>2</sub>O (B)-catalyzed polycondensation.

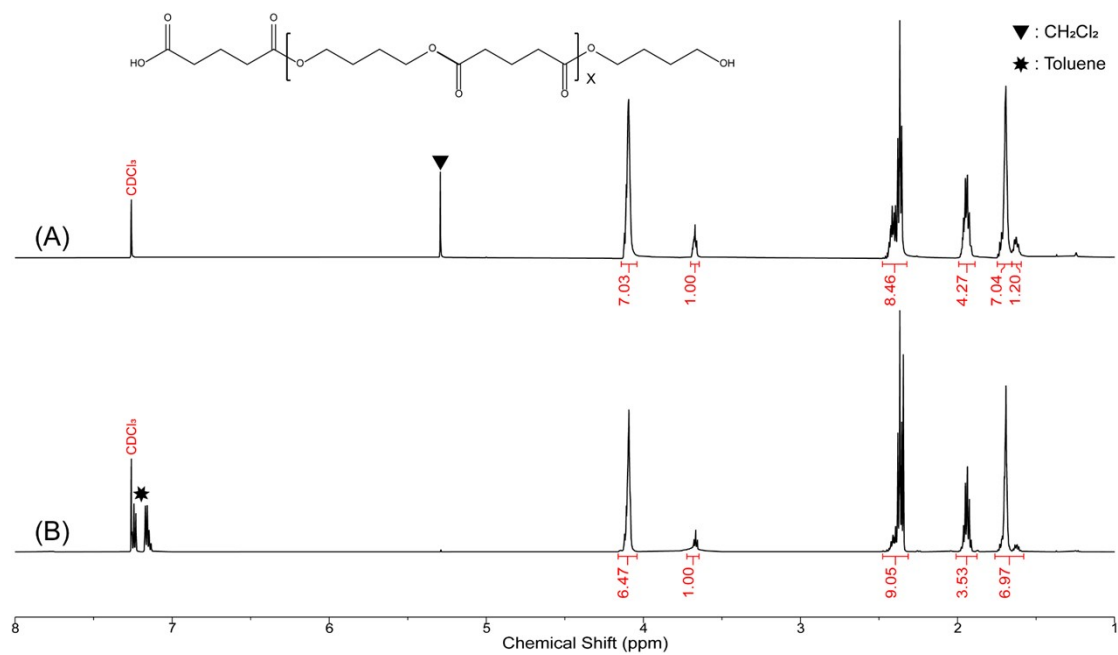

**Figure S12.** Comparison of  $^1\text{H}$  NMR spectra of PE34 obtained from DMSNs-Oct-SO<sub>3</sub>H (A) and TsOH·H<sub>2</sub>O (B)-catalyzed polycondensation.

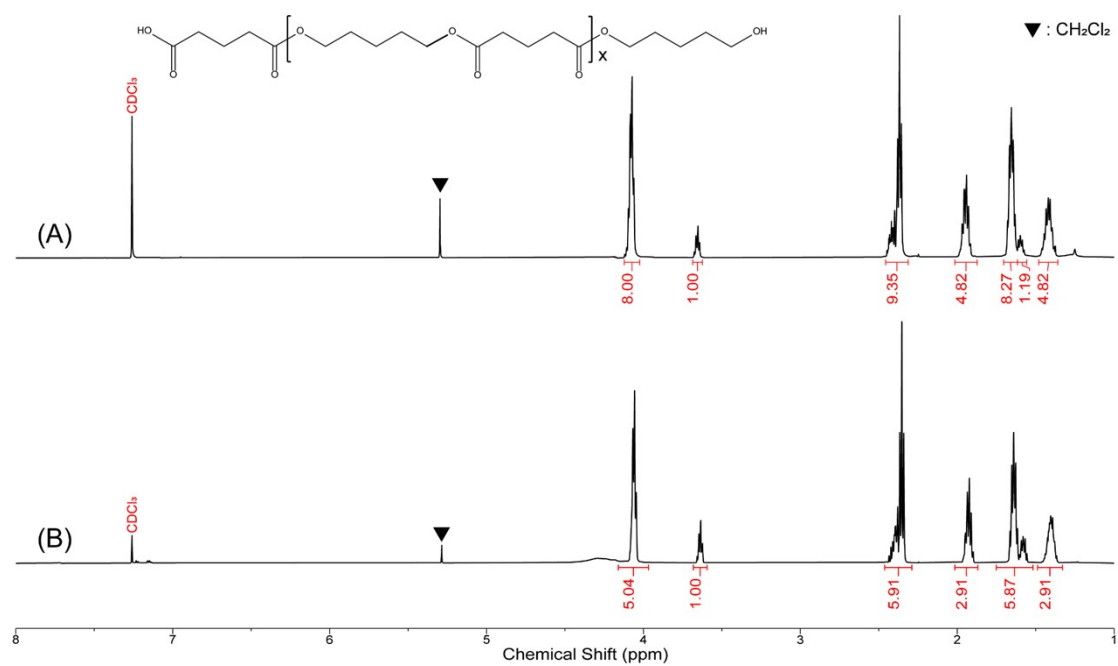

**Figure S13.** Comparison of  $^1\text{H}$  NMR spectra of PE35 obtained from DMSNs-Oct-SO<sub>3</sub>H (A) and TsOH·H<sub>2</sub>O (B)-catalyzed polycondensation.

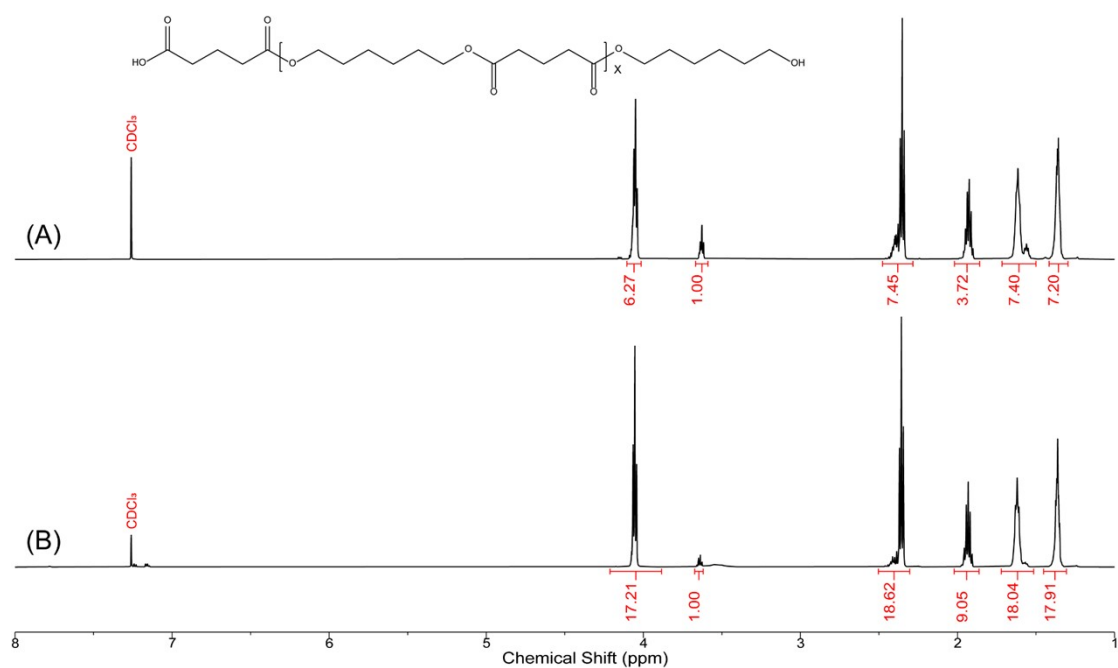

**Figure S14.** Comparison of  $^1\text{H}$  NMR spectra of PE36 obtained from DMSNs-Oct-SO<sub>3</sub>H (A) and TsOH·H<sub>2</sub>O (B)-catalyzed polycondensation.

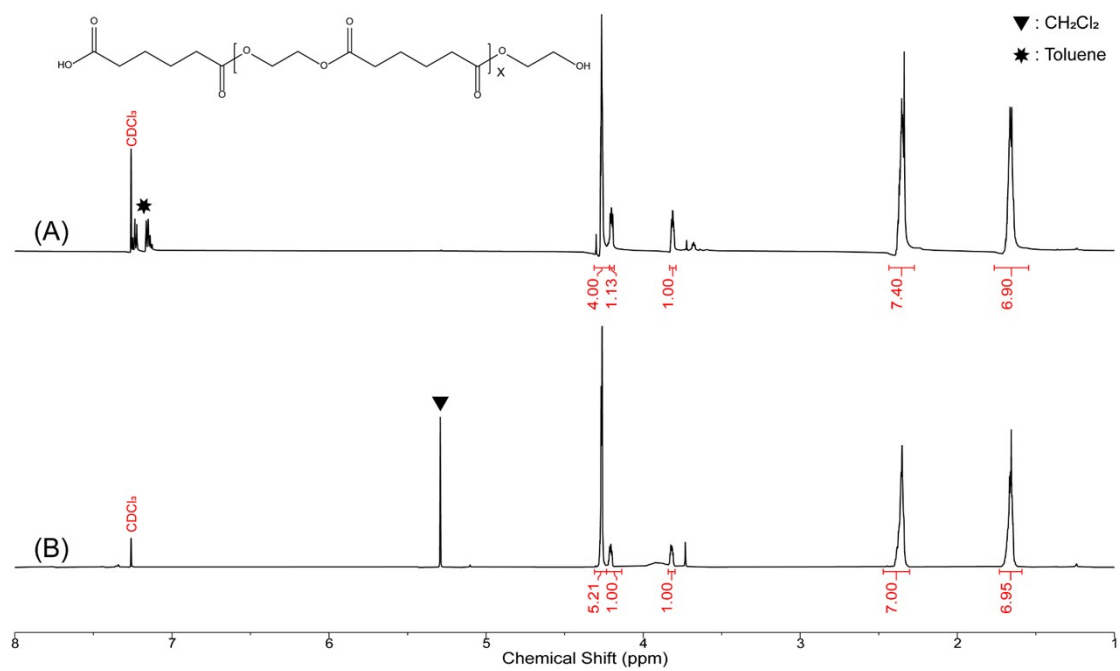

**Figure S15.** Comparison of  $^1\text{H}$  NMR spectra of PE42 obtained from DMSNs-Oct-SO<sub>3</sub>H (A) and TsOH·H<sub>2</sub>O (B)-catalyzed polycondensation.

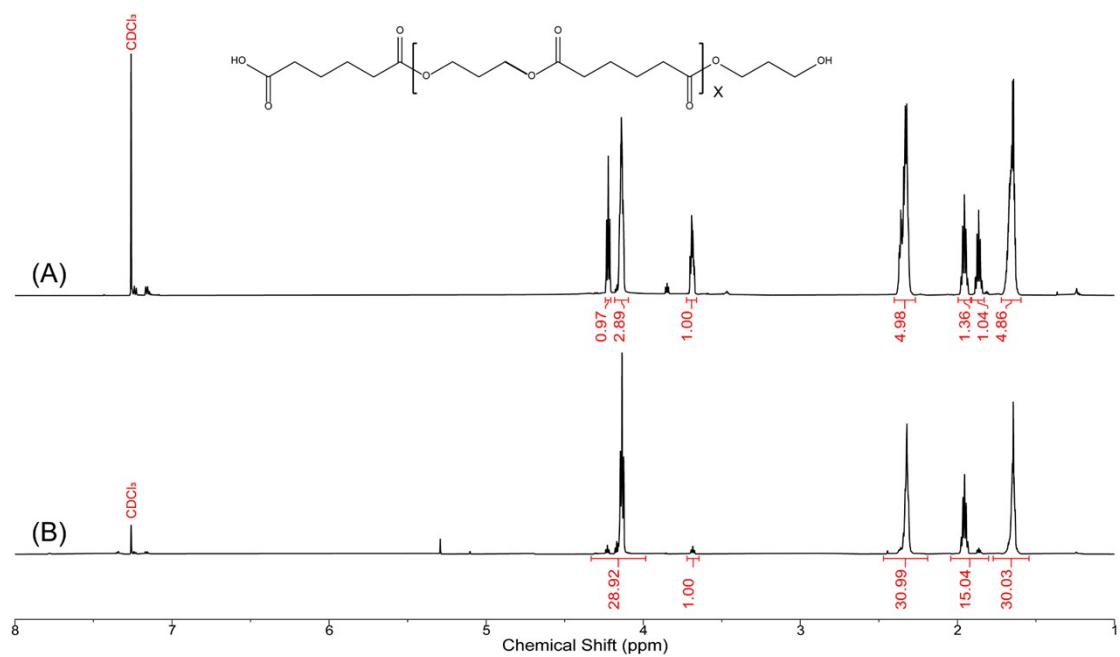

**Figure S16.** Comparison of  $^1\text{H}$  NMR spectra of PE43 obtained from DMSNs-Oct-SO<sub>3</sub>H (A) and TsOH·H<sub>2</sub>O (B)-catalyzed polycondensation.



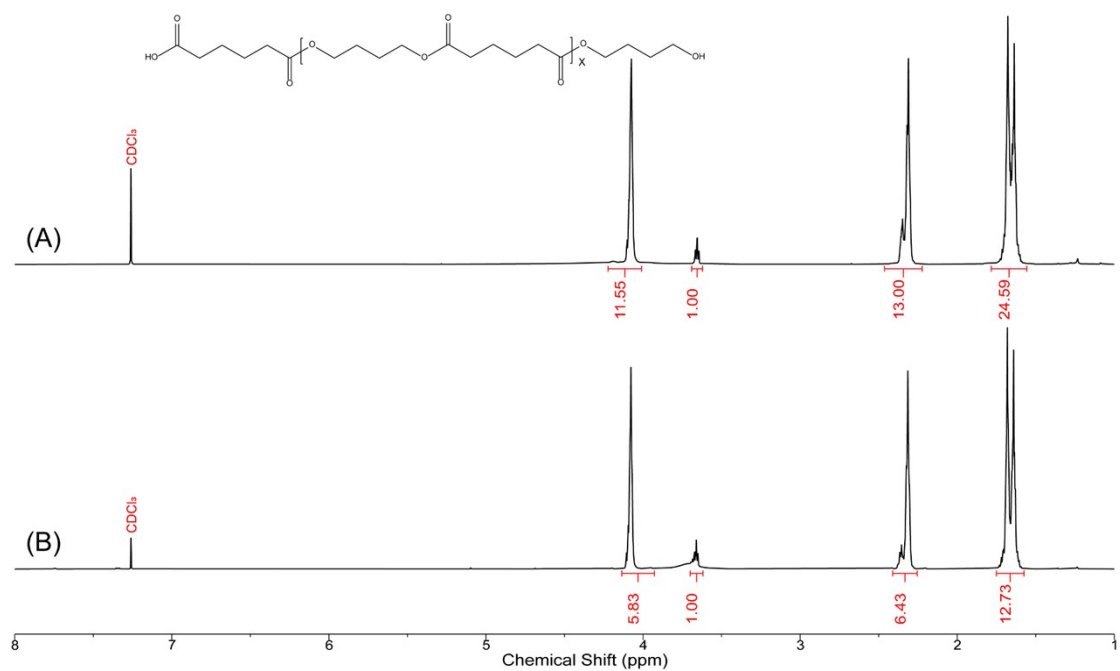

**Figure S17.** Comparison of <sup>1</sup>H NMR spectra of PE44 obtained from DMSNs-Oct-SO<sub>3</sub>H (A) and TsOH·H<sub>2</sub>O (B)-catalyzed polycondensation.

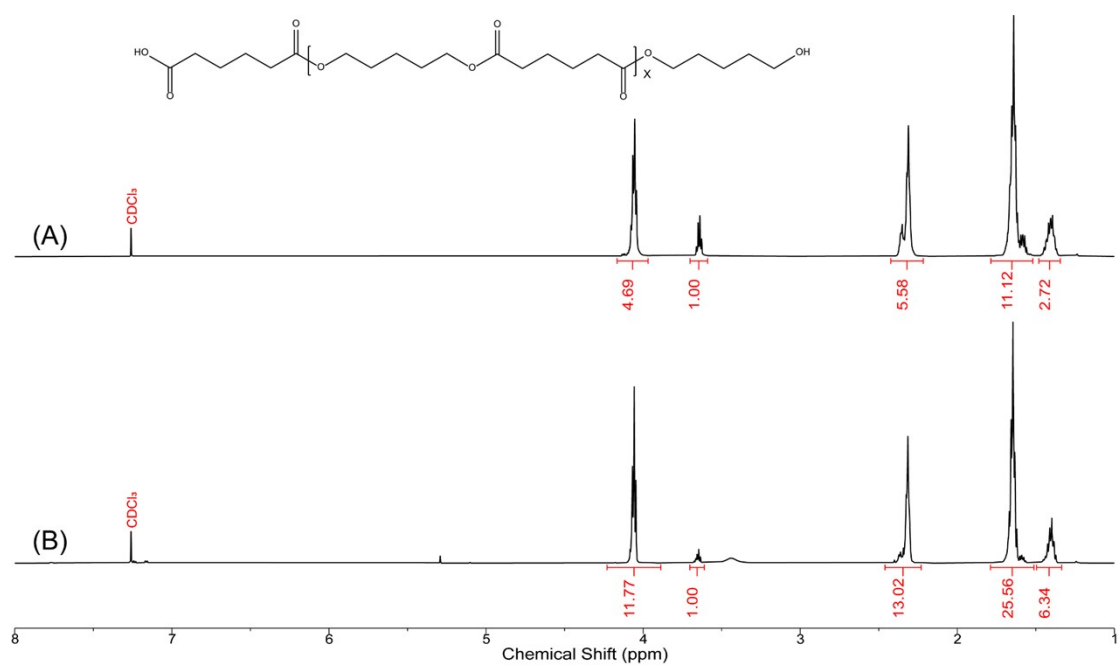

**Figure S18.** Comparison of <sup>1</sup>H NMR spectra of PE45 obtained from DMSNs-Oct-SO<sub>3</sub>H (A) and TsOH·H<sub>2</sub>O (B)-catalyzed polycondensation.

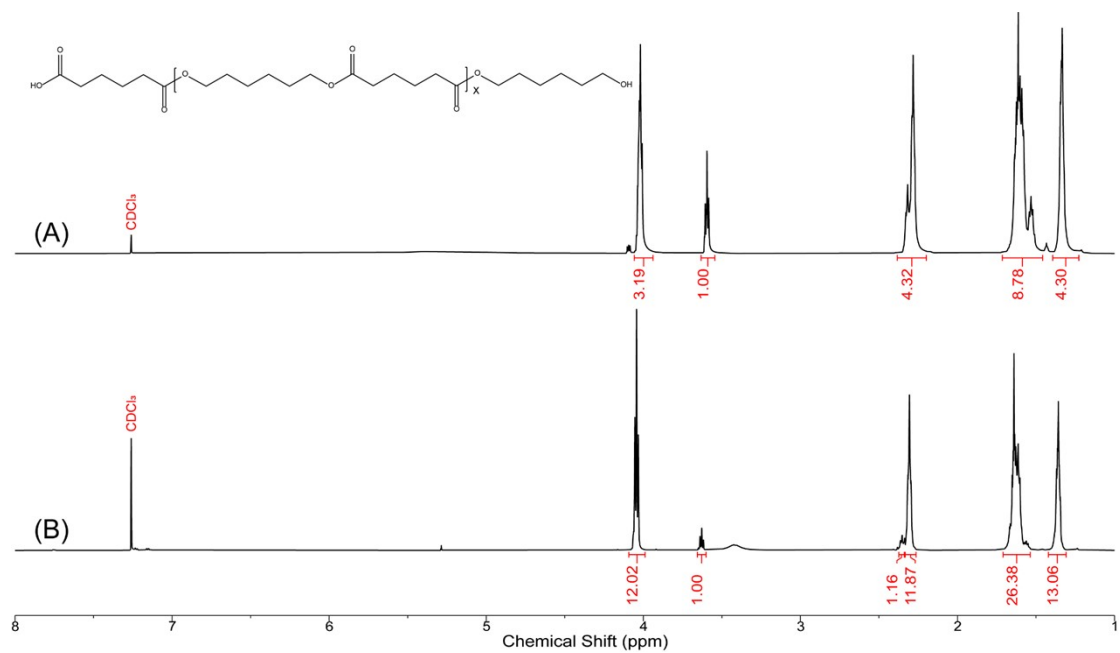

**Figure S19.** Comparison of  $^1\text{H}$  NMR spectra of PE46 obtained from DMSNs-Oct- $\text{SO}_3\text{H}$  (A) and  $\text{TsOH}\cdot\text{H}_2\text{O}$  (B)-catalyzed polycondensation.

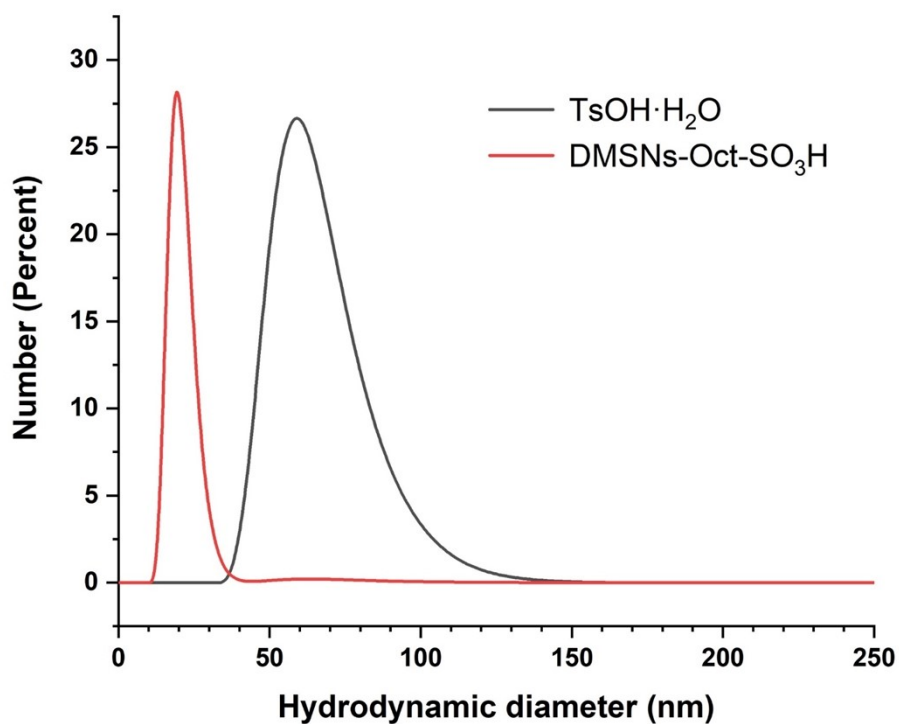

**Figure S20.** Hydrodynamic diameter of PHDAs obtained from DMSNs-Oct- $\text{SO}_3\text{H}$  (red) and  $\text{TsOH}\cdot\text{H}_2\text{O}$  (black)-catalyzed polycondensation measured by DLS analysis.
